# Supplementary material for: Overexpression of SIRT1 promotes metastasis through epithelial-mesenchymal transition in hepatocellular carcinoma
Source: PubMed Central journal article supplement (PMC4391082; doi:10.1186/1471-2407-14-978), 2014-12-18
Supplement: 12885_2014_5245_MOESM1_ESM.pdf [file 12885_2014_5245_MOESM1_ESM.pdf]

## Additional file 1.

Sequences of RT-PCR oligonucleotide primers.

| Gene       |   | Sequence (5' → 3')       |
|------------|---|--------------------------|
| E-cadherin | F | TGAAGGTGACAGAGCCTCTGGA   |
|            | R | TGGGTGAATTCGGGCTTGTT     |
| Vimentin   | F | TGGCCGACGCCATCAACACC     |
|            | R | CACCTCGACGCGGGCTTTGT     |
| Twist      | F | GCCAGGTACATCGACTTCCTCT   |
|            | R | TCCATCCTCCAGACCGAGAAGG   |
| SIRT1      | F | TGCTGGCCTAATAGAGTGGA     |
|            | R | CTCAGCGCCATGGAAAATGT     |
| Snail      | F | CCTCCCTGTCAGATGAGGAC     |
|            | R | CCAGGCTGAGGTATTCCTTG     |
| GAPDH      | F | TGCCAAATATGATGACATCAAGAA |
|            | R | GGAGTGGGTGTCGCTGTTG      |

## Supplementary figure 1.

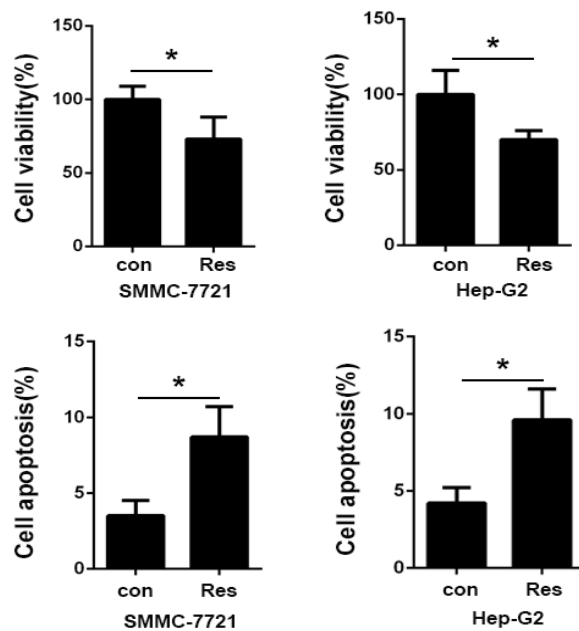

The effect of resveratrol on the cell viability and apoptosis of HCC cells were measured using cell viability assay and apoptosis assay. SMMC-7721 and HepG2 cells were treated with

resveratrol (50  $\mu\text{mol/L}$ ). Results represent means of triplicate experiments  $\pm$  standard errors (\* $P < 0.05$ ).
